# Supplementary material
Source: PubMed Central journal article supplement (PMC3581364)
Supplement: NIHMS439266-supplement-1_si_001.pdf [file NIHMS439266-supplement-1_si_001.pdf]

# Fluorescence of Tryptophan in Designed Hairpin and Trp-cage Miniproteins: Measurements of Fluorescence Yields and Calculations by Quantum Mechanical Molecular Dynamics Simulations

Andrew W. McMillan,<sup>†,§</sup> Brandon L. Kier,<sup>‡,§</sup> Irene Shu,<sup>‡</sup> Aimee Byrne,<sup>‡</sup> Niels H. Andersen<sup>‡,§</sup> and William W. Parson<sup>\*,†,§</sup>

<sup>†</sup>Department of Biochemistry, <sup>‡</sup>Department of Chemistry and <sup>§</sup>Program in Biological Physics, Structure and Design, University of Washington, Seattle, WA 98195

## SUPPORTING INFORMATION

### 1. Molecular Dynamics Parameters

The center of mass of the protein ( $\mathbf{X}_M$ ) was constrained to a point ( $\mathbf{X}_0$ ) by subjecting each protein atom ( $i$ ) to a force  $\mathbf{F}_{M,i} = -k_M(\mathbf{X}_M - \mathbf{X}_0)m_i/M$ , where  $m_i$  is the atomic mass,  $M$  is the total mass of the protein, and  $k_M = 10^4 \text{ kcal}\cdot\text{mol}^{-1}\cdot\text{\AA}^{-2}$ . To hold the water molecules in a sphere with radius  $R$  around  $\mathbf{X}_0$ , force  $\mathbf{F}_{R,j} = -k_R\mathbf{D}_j$  was applied to each water O atom  $j$  for which  $D_j > R$ , where  $D_j = |\mathbf{D}_j|$ ,  $\mathbf{D}_j = \mathbf{X}_j - \mathbf{X}_0$ ,  $\mathbf{X}_j$  is the position of  $j$ , and  $k_R = 25 \text{ kcal}\cdot\text{mol}^{-1}\cdot\text{\AA}^{-2}$ . The total angular momentum of the water ( $\mathbf{L}_W$ ) was held to zero by subjecting each water atom  $j$  (including hydrogens) to a force  $\mathbf{F}_{L,j} = -k_L m_j \mathbf{L}_W \times \mathbf{v}_j$ , where  $\mathbf{v}_j$  is the velocity of atom  $j$ ,  $k_L = 5 \times 10^{-5} \text{ kcal}\cdot\text{mol}^{-1}\cdot(\text{Da}\cdot\text{\AA}^2\cdot\text{fs}^{-1})^{-2}$ .

Tables S1 and S2 give the parameters used for stretching and bending of the bonds of 3-methylindole and tryptophan in the ground and excited singlet ( $^1L_a$ ) states.

**Table S1. Bond-stretching Parameters.**

| Bond <sup>(a)</sup> |               | Ground State                         |                                             | <sup>1</sup> L <sub>a</sub>          |                                             |
|---------------------|---------------|--------------------------------------|---------------------------------------------|--------------------------------------|---------------------------------------------|
| atom <i>i</i>       | atom <i>j</i> | <i>b</i> <sub>0</sub> <sup>(b)</sup> | <i>f</i> <sub><i>b</i></sub> <sup>(c)</sup> | <i>b</i> <sub>0</sub> <sup>(b)</sup> | <i>f</i> <sub><i>b</i></sub> <sup>(c)</sup> |
| CG                  | CD1           | 1.344                                | 474.7                                       | 1.428                                | 375.9                                       |
| CG                  | CD2           | 1.451                                | 356.6                                       | 1.400                                | 403.8                                       |
| CD1                 | NE1           | 1.377                                | 430.5                                       | 1.354                                | 455.1                                       |
| NE1                 | CE2           | 1.391                                | 413.9                                       | 1.416                                | 391.2                                       |
| CE2                 | CZ2           | 1.400                                | 403.8                                       | 1.377                                | 430.5                                       |
| CE2                 | CD2           | 1.382                                | 424.4                                       | 1.414                                | 389.2                                       |
| CZ2                 | CH2           | 1.399                                | 404.9                                       | 1.502                                | 325.9                                       |
| CH2                 | CZ3           | 1.386                                | 419.7                                       | 1.364                                | 447.1                                       |
| CZ3                 | CE3           | 1.397                                | 407.1                                       | 1.423                                | 380.5                                       |
| CE3                 | CD2           | 1.412                                | 391.2                                       | 1.462                                | 348.6                                       |
| NE1                 | HE            | 0.980 <sup>(d)</sup>                 | 434.0 <sup>(d)</sup>                        | 1.000                                | 434.0                                       |
| CZ2                 | HZ1           | 1.000 <sup>(d)</sup>                 | 340.0 <sup>(d)</sup>                        | 0.980                                | 340.0                                       |
| CE3                 | HE2           | 1.000 <sup>(d)</sup>                 | 340.0 <sup>(d)</sup>                        | 0.980                                | 340.0                                       |

<sup>a</sup> Atom designations are shown in the structure to the right. Indole atom 3 is CG.

<sup>b</sup> Ideal bond length (Å).

<sup>c</sup> Force constant (kcal·mol<sup>-1</sup>·Å<sup>-2</sup>).

<sup>d</sup> Enzymix default value for bonds of this type.

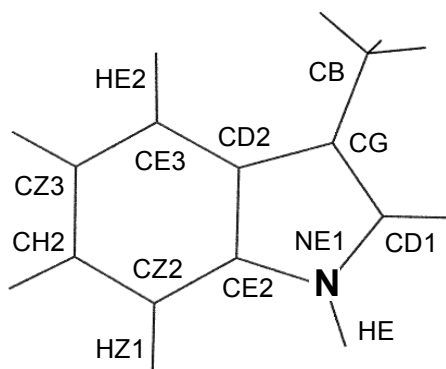

**Table S2. Bond-bending parameters.**

| atom <i>i</i> | Angle <sup>(a)</sup> |               | Ground                    | <sup>1</sup> L <sub>a</sub> |
|---------------|----------------------|---------------|---------------------------|-----------------------------|
|               | atom <i>j</i>        | atom <i>k</i> | $\theta_0$ <sup>(b)</sup> | $\theta_0$ <sup>(b)</sup>   |
| CB            | CG                   | CD1           | 128.0                     | 130.0                       |
| CB            | CG                   | CD2           | 126.5                     | 127.3                       |
| CD1           | CG                   | CD2           | 105.5                     | 102.6                       |
| CG            | CD1                  | NE1           | 111.5                     | 111.0                       |
| CD1           | NE1                  | CE2           | 107.4                     | 111.8                       |
| NE1           | CE2                  | CZ2           | 129.0                     | 132.7                       |
| NE1           | CE2                  | CD2           | 107.8                     | 104.7                       |
| CZ2           | CE2                  | CD2           | 123.2                     | 123.3                       |
| CG            | CD2                  | CE3           | 131.2                     | 131.3                       |
| CG            | CD2                  | CE2           | 107.7                     | 111.6                       |
| CE2           | CD2                  | CE3           | 121.1                     | 117.2                       |
| CZ3           | CE3                  | CD2           | 114.6                     | 122.8                       |
| CH2           | CZ3                  | CE3           | 124.8                     | 120.5                       |
| CZ2           | CH2                  | CZ3           | 119.7                     | 119.6                       |
| CE2           | CZ2                  | CH2           | 116.4                     | 118.8                       |

<sup>a</sup> Atoms are designated as in Table S1.

<sup>b</sup> Ideal bond angle (degrees). A force constant of 85 kcal·mol<sup>-1</sup>·radian<sup>-2</sup> was used for all these angles.

## 2. Contributions of Induced Dipoles to Reorganization Energies

Figure S1 shows distributions of the reorganization energies associated with induced dipoles, as calculated by eq. (22) for excitations of the hairpin peptide with Trp in position 1 and protonated His in position 8 (Ac-WVTIpGKHIFTG-NH<sub>2</sub>). The left-most curve (*red*, peak at 30 cm<sup>-1</sup> off scale vertically) is the reorganization energy of the first excited singlet  $\pi-\pi^*$  state of Trp1. The other curves are the reorganization energies for electron transfer from the indole ring of Trp1 to the protonated imidazole ring of His8 (*black*) and amides *a1* (*magenta*), *a2* (*blue*), *a9* (*cyan*), and *a8* (*green*), where the number following “*a*” indicates the residue that provides the amine group for the amide. The histograms include data from twenty 0.5-ns trajectories in the lowest excited singlet  $\pi-\pi^*$  state, and are normalized to constant area. Trajectories were propagated in steps of 1 fs, and  $\Delta E_{k,n}^g$  and  $\Delta E_{k,n}^e$  were evaluated every 500 steps. The quantum charges were scaled by a factor of 0.8 before they were used in the MD forcefield (see Figure S4 below).

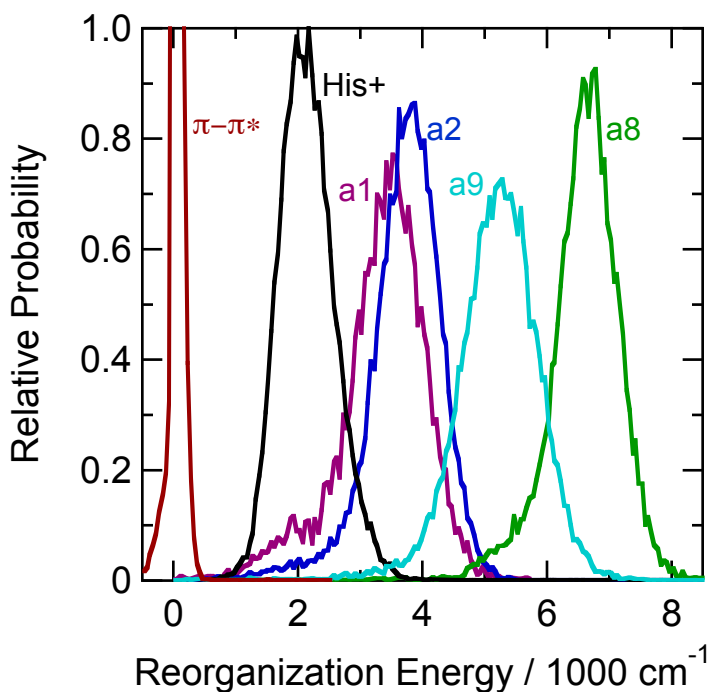

Figure S1.

### 3. Calculated Properties of Liquid Water

**Dipole moment.** Figure S2 shows the distribution of dipole moments calculated for liquid water as described in the text. The mean dipole moment ( $|\mu_{\text{total}}|$ ) was 2.95 debye (D), including 2.34 D from the permanent charges of the atoms ( $|\mu_{\text{perm}}|$ ). As noted in the text, the permanent charges in the ENZYMIX force field implicitly incorporate some polarization because they are parameterized for molecules in solution. The atomic polarizabilities of H and O were adjusted to bring the mean  $|\mu_{\text{total}}|$  into accord with the experimental value ( $2.95 \pm 0.2$  D)<sup>1</sup> and *ab initio* MD calculations by Silvestrelli and Parrinello.<sup>2</sup> The latter calculations gave the same mean but a broader distribution, possibly because the computational model was smaller (12 MD configurations of 64 water molecules), and thus presumably more sensitive to edge effects. The distribution of  $|\mu_{\text{total}}|$  shown in Fig. S1 is fit well by a Gaussian,  $\exp[-(|\mu_{\text{total}}| - \mu_0)^2 / 2\sigma^2]$  with  $\mu_0 = 2.94$  and  $\sigma = 0.194$  D. Calculations by Bernardo et al.,<sup>3</sup> Burnham and Xantheas,<sup>4</sup> Ren and Ponder<sup>5</sup> and Jensen *et al.*<sup>6</sup> have given mean dipole moments between 2.55 and 2.81 D.

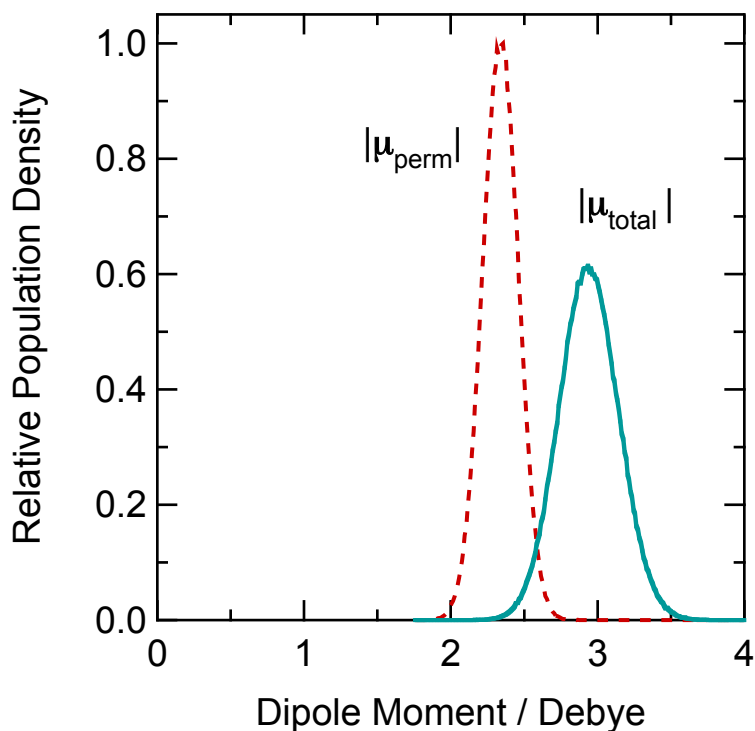

**Figure S2.**

**Radial distribution functions.** To evaluate the O-O and O-H radial distribution functions ( $g_{OO}$  and  $g_{OH}$ ), we averaged over the distributions around each of the  $\sim 261$  water molecules with an O atom within  $12 \text{ \AA}$  of the center of each ensemble, not including the molecule that was held at the center. The O-O distribution ( $g_{OO}$ , Figure S3A) peaks at  $2.73 \text{ \AA}$ , in reasonable accord with the distances between  $2.73$  and  $2.83 \text{ \AA}$  obtained in current analyses of X-ray and neutron diffraction data.<sup>7-9</sup> The peaks at  $1.74$  and  $3.23 \text{ \AA}$  in  $g_{OH}$  (Figure S3B) match the peaks in the distributions derived from diffraction data to within  $\pm 0.05 \text{ \AA}$ .

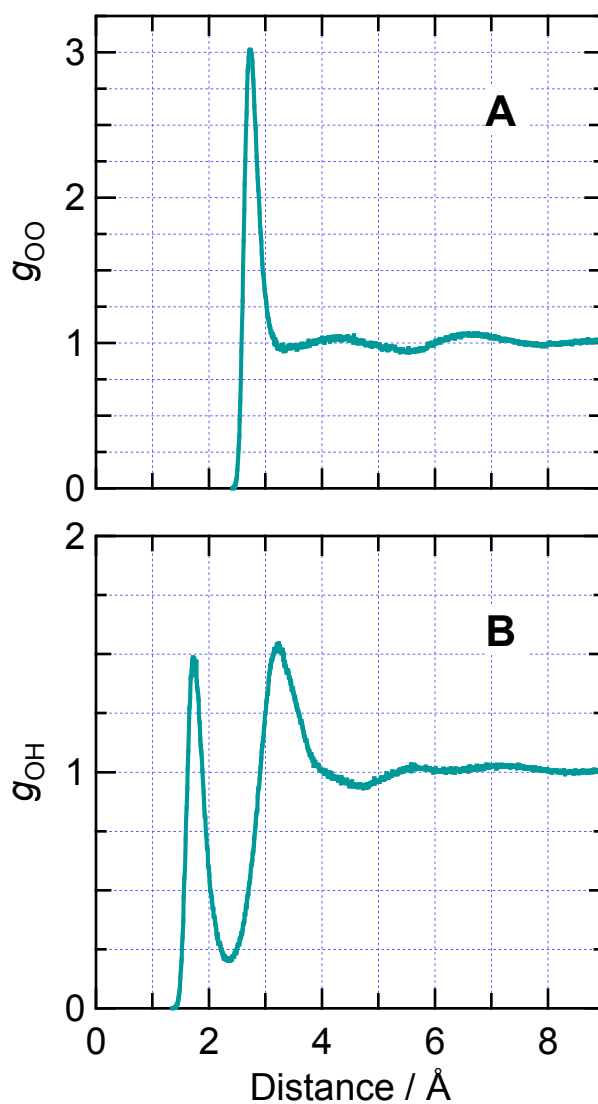

**Figure S3.**

**Bond length and angle.** The O-H bond length, H-O-H bond angle and molecular dipole moment were averaged over the 1000 ensembles saved during the simulation and over the ~746 molecules with an O atom within 17 Å of the center of each ensemble (again not counting the molecule at the center), leaving the shell between 17 and 21 Å to buffer edge effects. The mean bond length was 1.015 Å, in agreement with the experimental value of 1.01 Å reported by Soper & Benmore,<sup>7</sup> but somewhat greater than the 0.97 Å measured by Ichikawa *et al.*<sup>10</sup> and Silvestrelli and Parrinello's<sup>2</sup> *ab initio*-MD value of 0.991 Å. The mean bond angle of 106.0° matched both the measured angle<sup>10</sup> and the value obtained by *ab initio* MD calculations.<sup>2</sup>

**Diffusion coefficient.** The translational diffusion coefficient of water was obtained by identifying the water molecules within 8 Å of the center of each ensemble (skipping the central molecule again), and tracking their positions at 0.5-ps intervals for the 25-ps period represented by the next 50 ensembles. The mean-square displacement (MSD) at each delay time was averaged over all the possible ensembles (950 ensembles for the maximum delay of 25 ps, 999 for 0.5 ps). The period of 25 ps was short enough so that none of the molecules that were tracked approached the surface of the 21-Å sphere. Neglecting the expected nonlinearity at times below 0.5 ps, the MSD increased linearly with a slope ( $s$ ) of  $1.477 \pm 0.001 \text{ \AA}^2/\text{ps}$ , giving a diffusion coefficient ( $s/6$ ) of  $0.246 \text{ \AA}^2/\text{ps}$  or  $2.46 \times 10^{-5} \text{ cm}^2/\text{s}$ . The experimental value for water at 300 K is  $2.30 \times 10^{-5} \text{ cm}^2/\text{s}$ .<sup>11,12</sup>

#### 4. Calculated Fluorescence Properties of 3-Methylindole in Water

Figure S4 shows calculated emission peak (*A* and *C*) and full width at half-maximum amplitude (FWHM, *B* and *D*) of 3-methylindole (3MI), when the atomic charges or classical potentials were scaled by variable factors. Simulations of 3MI in a 16-Å sphere of water were propagated as described in the text. In panels *A* and *C*, the quantum charges of the 3MI atoms were multiplied by the factor indicated on the abscissa before they were used in the MD forcefield. In panels *B* and *D*, the classical potentials from the solvent atoms were multiplied by the indicated factor before they were added to the diagonal terms of the Fock Hamiltonian.

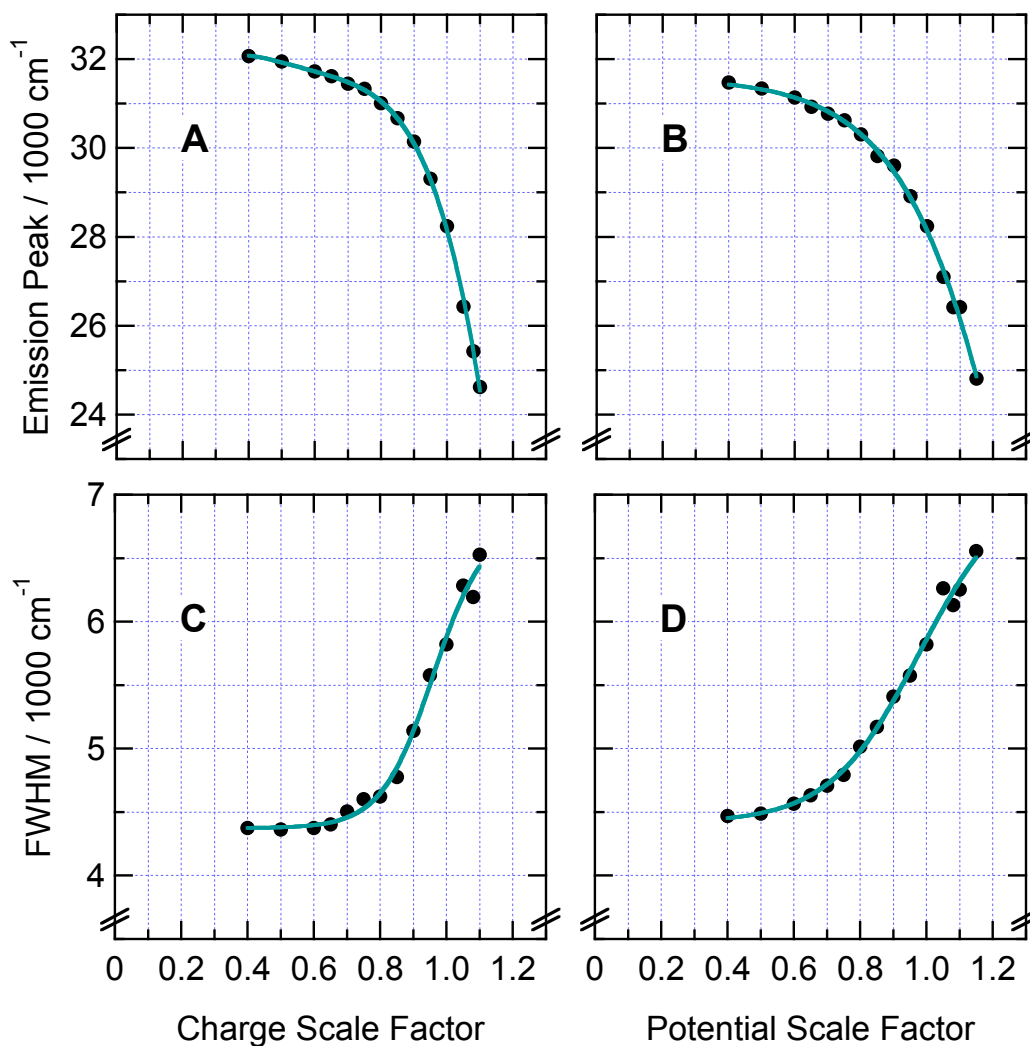

Figure S4.



## 5. NMR Structures of the His8 Hairpin Peptide

An ensemble of 17 of the 20 accepted NMR structures of the  $\beta$ -hairpin peptide Ac-WVTIpGKHIFTG-NH<sub>2</sub> is shown in Figure S5. The Mean global root-mean-square deviations (RMSDs) of the backbone atoms and all heavy atoms were  $0.69 \pm 0.34$  and  $1.25 \pm 0.45$  Å, respectively. Table S3 gives the atomic coordinates of the structure we used for MD simulations and for generating initial structures of other peptides of the hairpin series.

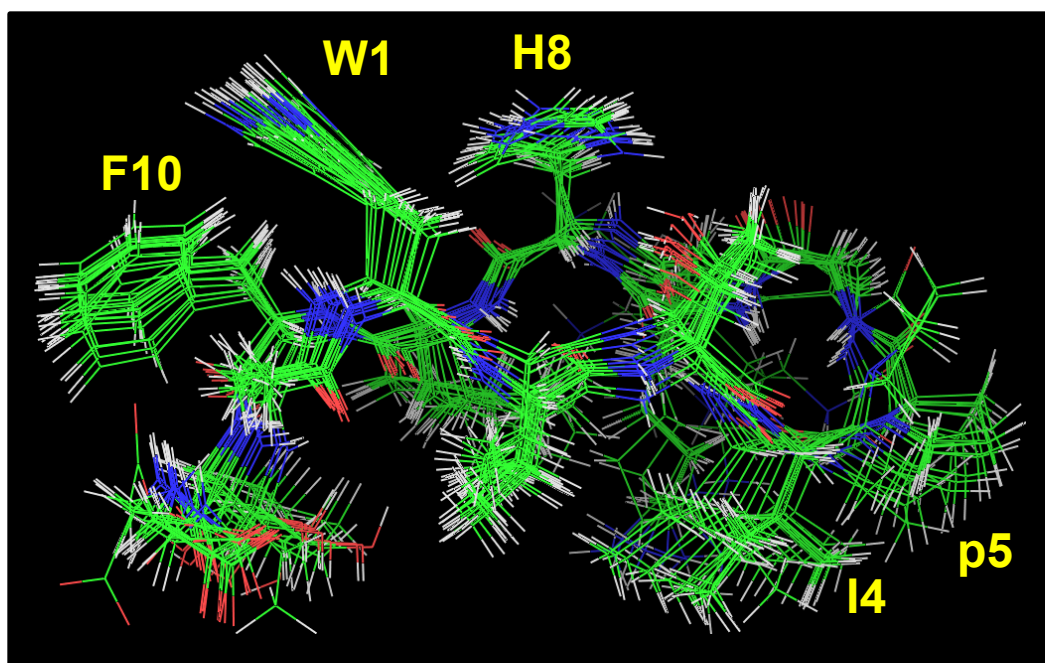

Figure S5.

Table S3.

```

REMARK FILENAME="HP8_1.pdb"
REMARK Accepted structure 1 of 20 structures.
REMARK Molecular dynamics scheme : torsion; torsion; cartesian; minimize.
REMARK High temperature dynamics :
REMARK     temp: 50000; steps: 1000; time(ps): 15.
REMARK 1st cooling stage :
REMARK     temp: 50000->0; steps: 1000; time(ps): 15; temp step: 250.
REMARK 2nd cooling stage :
REMARK     temp: 2000->0; steps: 3000; time(ps): 15; temp step: 25.
REMARK Total of 2000 steps of minimization.
REMARK VDW scale factors 0.1; 0.1->1; 1->4; 1.
REMARK 154 NOEs in 1 class(es) with scale factors of 150; 150; 150; 75.
REMARK     averaging function: sum.
REMARK 0 3-bond j-couplings.
REMARK 0 1-bond j-couplings.
REMARK 0 carbon chemical shifts.
REMARK 0 proton chemical shifts.
REMARK 0 diffusion anisotropy restraints.
REMARK 0 susceptibility anisotropy restraints.
REMARK 0 dihedral restraints.
REMARK 0 planarity restraints.
REMARK NCS restraints not used.
REMARK =====
REMARK               bond, angles, impropr, vdw(<1.6),  dihed
REMARK violations :      0      1      0      0      6
REMARK RMSD       : 0.0060  0.658  0.491      0  26.029
REMARK =====
REMARK               noe,   cdih,   coup,   oneb, carb-a, carb-b,
REMARK violations :      0      0      0      0      0  -----
REMARK RMSD       : 0.063  0.000  0.000  0.000  0.000  0.000
REMARK 0.2/2 viol.:      5      0      0
REMARK =====
REMARK               dani,   sani
REMARK violations :      0      0
REMARK RMSD       : 0.000  0.000
REMARK .2/.1 viol.:      0      0
REMARK =====
REMARK overall = 50.7669
REMARK bon     = 7.45625
REMARK ang     = 24.3984
REMARK imp     = 4.21964
REMARK vdw     = -31.3351
REMARK harm    = 0
REMARK noe     = 46.0277
REMARK coup    = 0
REMARK oneb    = 0
REMARK carb    = 0
REMARK prot    = 0
REMARK dani    = 0
REMARK sani    = 0
REMARK cdih    = 0
REMARK ncs     = 0

```

| REMARK | ===== |      |     |   |        |        |        |      |      |
|--------|-------|------|-----|---|--------|--------|--------|------|------|
| ATOM   | 1     | N    | TRP | 1 | 2.082  | 0.895  | 5.836  | 1.00 | 0.00 |
| ATOM   | 2     | HN   | TRP | 1 | 2.185  | 0.498  | 6.721  | 1.00 | 0.00 |
| ATOM   | 3     | CA   | TRP | 1 | 1.281  | 0.182  | 4.857  | 1.00 | 0.00 |
| ATOM   | 4     | HA   | TRP | 1 | 1.914  | -0.054 | 4.018  | 1.00 | 0.00 |
| ATOM   | 5     | CB   | TRP | 1 | 0.765  | -1.117 | 5.466  | 1.00 | 0.00 |
| ATOM   | 6     | HB1  | TRP | 1 | 0.059  | -1.555 | 4.802  | 1.00 | 0.00 |
| ATOM   | 7     | HB2  | TRP | 1 | 0.282  | -0.909 | 6.406  | 1.00 | 0.00 |
| ATOM   | 8     | CG   | TRP | 1 | 1.841  | -2.117 | 5.703  | 1.00 | 0.00 |
| ATOM   | 9     | CD1  | TRP | 1 | 2.400  | -2.454 | 6.891  | 1.00 | 0.00 |
| ATOM   | 10    | HD1  | TRP | 1 | 2.114  | -2.019 | 7.831  | 1.00 | 0.00 |
| ATOM   | 11    | CD2  | TRP | 1 | 2.481  | -2.909 | 4.712  | 1.00 | 0.00 |
| ATOM   | 12    | NE1  | TRP | 1 | 3.369  | -3.412 | 6.701  | 1.00 | 0.00 |
| ATOM   | 13    | HE1  | TRP | 1 | 3.918  | -3.816 | 7.405  | 1.00 | 0.00 |
| ATOM   | 14    | CE2  | TRP | 1 | 3.434  | -3.709 | 5.363  | 1.00 | 0.00 |
| ATOM   | 15    | CE3  | TRP | 1 | 2.336  | -3.013 | 3.335  | 1.00 | 0.00 |
| ATOM   | 16    | HE3  | TRP | 1 | 1.602  | -2.420 | 2.800  | 1.00 | 0.00 |
| ATOM   | 17    | CZ2  | TRP | 1 | 4.244  | -4.607 | 4.672  | 1.00 | 0.00 |
| ATOM   | 18    | HZ2  | TRP | 1 | 4.977  | -5.221 | 5.172  | 1.00 | 0.00 |
| ATOM   | 19    | CZ3  | TRP | 1 | 3.128  | -3.898 | 2.651  | 1.00 | 0.00 |
| ATOM   | 20    | HZ3  | TRP | 1 | 3.017  | -3.986 | 1.587  | 1.00 | 0.00 |
| ATOM   | 21    | CH2  | TRP | 1 | 4.077  | -4.689 | 3.315  | 1.00 | 0.00 |
| ATOM   | 22    | HH2  | TRP | 1 | 4.679  | -5.372 | 2.734  | 1.00 | 0.00 |
| ATOM   | 23    | C    | TRP | 1 | 0.113  | 1.024  | 4.360  | 1.00 | 0.00 |
| ATOM   | 24    | O    | TRP | 1 | -0.669 | 1.557  | 5.150  | 1.00 | 0.00 |
| ATOM   | 25    | CT   | TRP | 1 | 3.480  | 2.681  | 6.688  | 1.00 | 0.00 |
| ATOM   | 26    | HA1  | TRP | 1 | 2.830  | 3.327  | 7.265  | 1.00 | 0.00 |
| ATOM   | 27    | HA2  | TRP | 1 | 4.286  | 3.258  | 6.271  | 1.00 | 0.00 |
| ATOM   | 28    | HA3  | TRP | 1 | 3.882  | 1.893  | 7.312  | 1.00 | 0.00 |
| ATOM   | 29    | CX   | TRP | 1 | 2.679  | 2.059  | 5.565  | 1.00 | 0.00 |
| ATOM   | 30    | OX   | TRP | 1 | 2.599  | 2.614  | 4.467  | 1.00 | 0.00 |
| ATOM   | 31    | N    | VAL | 2 | 0.004  | 1.122  | 3.039  | 1.00 | 0.00 |
| ATOM   | 32    | HN   | VAL | 2 | 0.653  | 0.665  | 2.477  | 1.00 | 0.00 |
| ATOM   | 33    | CA   | VAL | 2 | -1.061 | 1.877  | 2.404  | 1.00 | 0.00 |
| ATOM   | 34    | HA   | VAL | 2 | -1.768 | 2.141  | 3.169  | 1.00 | 0.00 |
| ATOM   | 35    | CB   | VAL | 2 | -0.544 | 3.178  | 1.748  | 1.00 | 0.00 |
| ATOM   | 36    | HB   | VAL | 2 | -1.379 | 3.647  | 1.247  | 1.00 | 0.00 |
| ATOM   | 37    | CG1  | VAL | 2 | -0.018 | 4.148  | 2.803  | 1.00 | 0.00 |
| ATOM   | 38    | HG11 | VAL | 2 | 1.044  | 4.289  | 2.664  | 1.00 | 0.00 |
| ATOM   | 39    | HG12 | VAL | 2 | -0.200 | 3.747  | 3.789  | 1.00 | 0.00 |
| ATOM   | 40    | HG13 | VAL | 2 | -0.522 | 5.098  | 2.702  | 1.00 | 0.00 |
| ATOM   | 41    | CG2  | VAL | 2 | 0.534  | 2.884  | 0.707  | 1.00 | 0.00 |
| ATOM   | 42    | HG21 | VAL | 2 | 0.229  | 3.281  | -0.250 | 1.00 | 0.00 |
| ATOM   | 43    | HG22 | VAL | 2 | 0.680  | 1.818  | 0.625  | 1.00 | 0.00 |
| ATOM   | 44    | HG23 | VAL | 2 | 1.462  | 3.349  | 1.008  | 1.00 | 0.00 |
| ATOM   | 45    | C    | VAL | 2 | -1.769 | 1.026  | 1.354  | 1.00 | 0.00 |
| ATOM   | 46    | O    | VAL | 2 | -1.125 | 0.317  | 0.578  | 1.00 | 0.00 |
| ATOM   | 47    | N    | THR | 3 | -3.098 | 1.095  | 1.338  | 1.00 | 0.00 |
| ATOM   | 48    | HN   | THR | 3 | -3.555 | 1.676  | 1.983  | 1.00 | 0.00 |
| ATOM   | 49    | CA   | THR | 3 | -3.896 | 0.328  | 0.388  | 1.00 | 0.00 |
| ATOM   | 50    | HA   | THR | 3 | -3.218 | -0.318 | -0.172 | 1.00 | 0.00 |
| ATOM   | 51    | CB   | THR | 3 | -4.931 | -0.534 | 1.146  | 1.00 | 0.00 |
| ATOM   | 52    | HB   | THR | 3 | -5.777 | 0.089  | 1.452  | 1.00 | 0.00 |
| ATOM   | 53    | OG1  | THR | 3 | -4.355 | -1.095 | 2.316  | 1.00 | 0.00 |
| ATOM   | 54    | HG1  | THR | 3 | -3.514 | -1.504 | 2.097  | 1.00 | 0.00 |

|      |     |      |     |   |        |        |        |      |      |
|------|-----|------|-----|---|--------|--------|--------|------|------|
| ATOM | 55  | CG2  | THR | 3 | -5.477 | -1.677 | 0.321  | 1.00 | 0.00 |
| ATOM | 56  | HG21 | THR | 3 | -6.215 | -1.300 | -0.369 | 1.00 | 0.00 |
| ATOM | 57  | HG22 | THR | 3 | -5.933 | -2.406 | 0.975  | 1.00 | 0.00 |
| ATOM | 58  | HG23 | THR | 3 | -4.671 | -2.142 | -0.227 | 1.00 | 0.00 |
| ATOM | 59  | C    | THR | 3 | -4.596 | 1.274  | -0.584 | 1.00 | 0.00 |
| ATOM | 60  | O    | THR | 3 | -5.447 | 2.069  | -0.177 | 1.00 | 0.00 |
| ATOM | 61  | N    | ILE | 4 | -4.225 | 1.204  | -1.867 | 1.00 | 0.00 |
| ATOM | 62  | HN   | ILE | 4 | -3.531 | 0.558  | -2.141 | 1.00 | 0.00 |
| ATOM | 63  | CA   | ILE | 4 | -4.822 | 2.084  | -2.872 | 1.00 | 0.00 |
| ATOM | 64  | HA   | ILE | 4 | -5.761 | 2.432  | -2.473 | 1.00 | 0.00 |
| ATOM | 65  | CB   | ILE | 4 | -3.920 | 3.313  | -3.145 | 1.00 | 0.00 |
| ATOM | 66  | HB   | ILE | 4 | -2.982 | 2.958  | -3.544 | 1.00 | 0.00 |
| ATOM | 67  | CG1  | ILE | 4 | -3.648 | 4.083  | -1.847 | 1.00 | 0.00 |
| ATOM | 68  | HG11 | ILE | 4 | -3.413 | 3.380  | -1.061 | 1.00 | 0.00 |
| ATOM | 69  | HG12 | ILE | 4 | -4.533 | 4.638  | -1.573 | 1.00 | 0.00 |
| ATOM | 70  | CG2  | ILE | 4 | -4.553 | 4.232  | -4.182 | 1.00 | 0.00 |
| ATOM | 71  | HG21 | ILE | 4 | -5.454 | 4.668  | -3.776 | 1.00 | 0.00 |
| ATOM | 72  | HG22 | ILE | 4 | -4.796 | 3.663  | -5.068 | 1.00 | 0.00 |
| ATOM | 73  | HG23 | ILE | 4 | -3.858 | 5.017  | -4.439 | 1.00 | 0.00 |
| ATOM | 74  | CD1  | ILE | 4 | -2.500 | 5.063  | -1.952 | 1.00 | 0.00 |
| ATOM | 75  | HD11 | ILE | 4 | -1.685 | 4.607  | -2.495 | 1.00 | 0.00 |
| ATOM | 76  | HD12 | ILE | 4 | -2.165 | 5.333  | -0.961 | 1.00 | 0.00 |
| ATOM | 77  | HD13 | ILE | 4 | -2.829 | 5.949  | -2.474 | 1.00 | 0.00 |
| ATOM | 78  | C    | ILE | 4 | -5.074 | 1.341  | -4.188 | 1.00 | 0.00 |
| ATOM | 79  | O    | ILE | 4 | -4.179 | 0.661  | -4.697 | 1.00 | 0.00 |
| ATOM | 80  | N    | PRO | 5 | -6.301 | 1.448  | -4.763 | 1.00 | 0.00 |
| ATOM | 81  | CA   | PRO | 5 | -6.622 | 0.756  | -6.024 | 1.00 | 0.00 |
| ATOM | 82  | HA   | PRO | 5 | -5.854 | 0.922  | -6.749 | 1.00 | 0.00 |
| ATOM | 83  | CB   | PRO | 5 | -7.937 | 1.395  | -6.488 | 1.00 | 0.00 |
| ATOM | 84  | HB1  | PRO | 5 | -8.762 | 0.745  | -6.235 | 1.00 | 0.00 |
| ATOM | 85  | HB2  | PRO | 5 | -7.914 | 1.549  | -7.559 | 1.00 | 0.00 |
| ATOM | 86  | CG   | PRO | 5 | -8.030 | 2.687  | -5.760 | 1.00 | 0.00 |
| ATOM | 87  | HG1  | PRO | 5 | -9.064 | 2.916  | -5.561 | 1.00 | 0.00 |
| ATOM | 88  | HG2  | PRO | 5 | -7.579 | 3.473  | -6.348 | 1.00 | 0.00 |
| ATOM | 89  | CD   | PRO | 5 | -7.284 | 2.513  | -4.468 | 1.00 | 0.00 |
| ATOM | 90  | HD1  | PRO | 5 | -7.958 | 2.208  | -3.681 | 1.00 | 0.00 |
| ATOM | 91  | HD2  | PRO | 5 | -6.791 | 3.435  | -4.207 | 1.00 | 0.00 |
| ATOM | 92  | C    | PRO | 5 | -6.807 | -0.750 | -5.857 | 1.00 | 0.00 |
| ATOM | 93  | O    | PRO | 5 | -7.168 | -1.450 | -6.806 | 1.00 | 0.00 |
| ATOM | 94  | N    | GLY | 6 | -6.544 | -1.237 | -4.656 | 1.00 | 0.00 |
| ATOM | 95  | HN   | GLY | 6 | -6.253 | -0.630 | -3.960 | 1.00 | 0.00 |
| ATOM | 96  | CA   | GLY | 6 | -6.666 | -2.649 | -4.370 | 1.00 | 0.00 |
| ATOM | 97  | HA1  | GLY | 6 | -7.012 | -3.157 | -5.258 | 1.00 | 0.00 |
| ATOM | 98  | HA2  | GLY | 6 | -7.396 | -2.783 | -3.585 | 1.00 | 0.00 |
| ATOM | 99  | C    | GLY | 6 | -5.352 | -3.270 | -3.931 | 1.00 | 0.00 |
| ATOM | 100 | O    | GLY | 6 | -5.344 | -4.390 | -3.417 | 1.00 | 0.00 |
| ATOM | 101 | N    | LYS | 7 | -4.232 | -2.563 | -4.147 | 1.00 | 0.00 |
| ATOM | 102 | HN   | LYS | 7 | -4.279 | -1.686 | -4.574 | 1.00 | 0.00 |
| ATOM | 103 | CA   | LYS | 7 | -2.933 | -3.090 | -3.778 | 1.00 | 0.00 |
| ATOM | 104 | HA   | LYS | 7 | -3.022 | -4.154 | -3.785 | 1.00 | 0.00 |
| ATOM | 105 | CB   | LYS | 7 | -1.869 | -2.676 | -4.797 | 1.00 | 0.00 |
| ATOM | 106 | HB1  | LYS | 7 | -0.896 | -2.845 | -4.363 | 1.00 | 0.00 |
| ATOM | 107 | HB2  | LYS | 7 | -1.973 | -1.623 | -5.004 | 1.00 | 0.00 |
| ATOM | 108 | CG   | LYS | 7 | -1.945 | -3.438 | -6.111 | 1.00 | 0.00 |
| ATOM | 109 | HG1  | LYS | 7 | -2.932 | -3.863 | -6.215 | 1.00 | 0.00 |

|      |     |      |     |    |        |        |        |      |      |
|------|-----|------|-----|----|--------|--------|--------|------|------|
| ATOM | 110 | HG2  | LYS | 7  | -1.211 | -4.230 | -6.099 | 1.00 | 0.00 |
| ATOM | 111 | CD   | LYS | 7  | -1.669 | -2.531 | -7.300 | 1.00 | 0.00 |
| ATOM | 112 | HD1  | LYS | 7  | -0.687 | -2.095 | -7.187 | 1.00 | 0.00 |
| ATOM | 113 | HD2  | LYS | 7  | -2.411 | -1.748 | -7.322 | 1.00 | 0.00 |
| ATOM | 114 | CE   | LYS | 7  | -1.722 | -3.297 | -8.613 | 1.00 | 0.00 |
| ATOM | 115 | HE1  | LYS | 7  | -1.877 | -2.594 | -9.418 | 1.00 | 0.00 |
| ATOM | 116 | HE2  | LYS | 7  | -2.551 | -3.989 | -8.578 | 1.00 | 0.00 |
| ATOM | 117 | NZ   | LYS | 7  | -0.467 | -4.059 | -8.867 | 1.00 | 0.00 |
| ATOM | 118 | HZ1  | LYS | 7  | -0.335 | -4.786 | -8.135 | 1.00 | 0.00 |
| ATOM | 119 | HZ2  | LYS | 7  | 0.351  | -3.416 | -8.854 | 1.00 | 0.00 |
| ATOM | 120 | HZ3  | LYS | 7  | -0.513 | -4.522 | -9.797 | 1.00 | 0.00 |
| ATOM | 121 | C    | LYS | 7  | -2.485 | -2.648 | -2.388 | 1.00 | 0.00 |
| ATOM | 122 | O    | LYS | 7  | -3.001 | -1.685 | -1.821 | 1.00 | 0.00 |
| ATOM | 123 | N    | HIS | 8  | -1.486 | -3.364 | -1.878 | 1.00 | 0.00 |
| ATOM | 124 | HN   | HIS | 8  | -1.121 | -4.098 | -2.407 | 1.00 | 0.00 |
| ATOM | 125 | CA   | HIS | 8  | -0.884 | -3.098 | -0.586 | 1.00 | 0.00 |
| ATOM | 126 | HA   | HIS | 8  | -1.403 | -2.276 | -0.116 | 1.00 | 0.00 |
| ATOM | 127 | CB   | HIS | 8  | -0.999 | -4.342 | 0.287  | 1.00 | 0.00 |
| ATOM | 128 | HB1  | HIS | 8  | -0.056 | -4.871 | 0.275  | 1.00 | 0.00 |
| ATOM | 129 | HB2  | HIS | 8  | -1.763 | -4.979 | -0.108 | 1.00 | 0.00 |
| ATOM | 130 | CG   | HIS | 8  | -1.350 | -4.038 | 1.700  | 1.00 | 0.00 |
| ATOM | 131 | ND1  | HIS | 8  | -2.638 | -4.041 | 2.194  | 1.00 | 0.00 |
| ATOM | 132 | HD1  | HIS | 8  | -3.449 | -4.247 | 1.684  | 1.00 | 0.00 |
| ATOM | 133 | CD2  | HIS | 8  | -0.560 | -3.706 | 2.721  | 1.00 | 0.00 |
| ATOM | 134 | HD2  | HIS | 8  | 0.500  | -3.608 | 2.670  | 1.00 | 0.00 |
| ATOM | 135 | CE1  | HIS | 8  | -2.610 | -3.715 | 3.476  | 1.00 | 0.00 |
| ATOM | 136 | HE1  | HIS | 8  | -3.465 | -3.627 | 4.128  | 1.00 | 0.00 |
| ATOM | 137 | NE2  | HIS | 8  | -1.355 | -3.508 | 3.821  | 1.00 | 0.00 |
| ATOM | 138 | HE2  | HIS | 8  | -1.034 | -3.393 | 4.740  | 1.00 | 0.00 |
| ATOM | 139 | C    | HIS | 8  | 0.576  | -2.714 | -0.812 | 1.00 | 0.00 |
| ATOM | 140 | O    | HIS | 8  | 1.340  | -3.490 | -1.391 | 1.00 | 0.00 |
| ATOM | 141 | N    | ILE | 9  | 0.953  | -1.502 | -0.404 | 1.00 | 0.00 |
| ATOM | 142 | HN   | ILE | 9  | 0.308  | -0.915 | 0.024  | 1.00 | 0.00 |
| ATOM | 143 | CA   | ILE | 9  | 2.306  | -1.023 | -0.623 | 1.00 | 0.00 |
| ATOM | 144 | HA   | ILE | 9  | 2.896  | -1.861 | -0.963 | 1.00 | 0.00 |
| ATOM | 145 | CB   | ILE | 9  | 2.396  | 0.094  | -1.715 | 1.00 | 0.00 |
| ATOM | 146 | HB   | ILE | 9  | 2.957  | 0.893  | -1.272 | 1.00 | 0.00 |
| ATOM | 147 | CG1  | ILE | 9  | 1.040  | 0.676  | -2.191 | 1.00 | 0.00 |
| ATOM | 148 | HG11 | ILE | 9  | 1.224  | 1.258  | -3.083 | 1.00 | 0.00 |
| ATOM | 149 | HG12 | ILE | 9  | 0.642  | 1.339  | -1.438 | 1.00 | 0.00 |
| ATOM | 150 | CG2  | ILE | 9  | 3.178  | -0.397 | -2.923 | 1.00 | 0.00 |
| ATOM | 151 | HG21 | ILE | 9  | 4.028  | 0.251  | -3.087 | 1.00 | 0.00 |
| ATOM | 152 | HG22 | ILE | 9  | 2.538  | -0.380 | -3.795 | 1.00 | 0.00 |
| ATOM | 153 | HG23 | ILE | 9  | 3.520  | -1.405 | -2.751 | 1.00 | 0.00 |
| ATOM | 154 | CD1  | ILE | 9  | -0.024 | -0.347 | -2.539 | 1.00 | 0.00 |
| ATOM | 155 | HD11 | ILE | 9  | -0.690 | -0.476 | -1.699 | 1.00 | 0.00 |
| ATOM | 156 | HD12 | ILE | 9  | 0.446  | -1.290 | -2.775 | 1.00 | 0.00 |
| ATOM | 157 | HD13 | ILE | 9  | -0.587 | -0.003 | -3.394 | 1.00 | 0.00 |
| ATOM | 158 | C    | ILE | 9  | 2.943  | -0.473 | 0.653  | 1.00 | 0.00 |
| ATOM | 159 | O    | ILE | 9  | 2.351  | 0.357  | 1.346  | 1.00 | 0.00 |
| ATOM | 160 | N    | PHE | 10 | 4.178  | -0.908 | 0.927  | 1.00 | 0.00 |
| ATOM | 161 | HN   | PHE | 10 | 4.610  | -1.546 | 0.313  | 1.00 | 0.00 |
| ATOM | 162 | CA   | PHE | 10 | 4.925  | -0.421 | 2.088  | 1.00 | 0.00 |
| ATOM | 163 | HA   | PHE | 10 | 4.219  | -0.086 | 2.839  | 1.00 | 0.00 |
| ATOM | 164 | CB   | PHE | 10 | 5.813  | -1.523 | 2.681  | 1.00 | 0.00 |

|      |     |      |     |    |       |        |        |      |      |
|------|-----|------|-----|----|-------|--------|--------|------|------|
| ATOM | 165 | HB1  | PHE | 10 | 6.581 | -1.772 | 1.965  | 1.00 | 0.00 |
| ATOM | 166 | HB2  | PHE | 10 | 5.214 | -2.404 | 2.856  | 1.00 | 0.00 |
| ATOM | 167 | CG   | PHE | 10 | 6.487 | -1.106 | 3.986  | 1.00 | 0.00 |
| ATOM | 168 | CD1  | PHE | 10 | 7.762 | -0.531 | 3.979  | 1.00 | 0.00 |
| ATOM | 169 | HD1  | PHE | 10 | 8.283 | -0.388 | 3.043  | 1.00 | 0.00 |
| ATOM | 170 | CD2  | PHE | 10 | 5.848 | -1.266 | 5.224  | 1.00 | 0.00 |
| ATOM | 171 | HD2  | PHE | 10 | 4.861 | -1.702 | 5.272  | 1.00 | 0.00 |
| ATOM | 172 | CE1  | PHE | 10 | 8.370 | -0.137 | 5.159  | 1.00 | 0.00 |
| ATOM | 173 | HE1  | PHE | 10 | 9.357 | 0.307  | 5.141  | 1.00 | 0.00 |
| ATOM | 174 | CE2  | PHE | 10 | 6.467 | -0.871 | 6.397  | 1.00 | 0.00 |
| ATOM | 175 | HE2  | PHE | 10 | 5.966 | -1.001 | 7.348  | 1.00 | 0.00 |
| ATOM | 176 | CZ   | PHE | 10 | 7.722 | -0.309 | 6.360  | 1.00 | 0.00 |
| ATOM | 177 | HZ   | PHE | 10 | 8.197 | -0.001 | 7.272  | 1.00 | 0.00 |
| ATOM | 178 | C    | PHE | 10 | 5.781 | 0.766  | 1.657  | 1.00 | 0.00 |
| ATOM | 179 | O    | PHE | 10 | 6.941 | 0.603  | 1.271  | 1.00 | 0.00 |
| ATOM | 180 | N    | THR | 11 | 5.191 | 1.957  | 1.699  | 1.00 | 0.00 |
| ATOM | 181 | HN   | THR | 11 | 4.258 | 2.020  | 1.999  | 1.00 | 0.00 |
| ATOM | 182 | CA   | THR | 11 | 5.890 | 3.171  | 1.287  | 1.00 | 0.00 |
| ATOM | 183 | HA   | THR | 11 | 6.922 | 2.909  | 1.118  | 1.00 | 0.00 |
| ATOM | 184 | CB   | THR | 11 | 5.294 | 3.699  | -0.027 | 1.00 | 0.00 |
| ATOM | 185 | HB   | THR | 11 | 5.684 | 4.688  | -0.213 | 1.00 | 0.00 |
| ATOM | 186 | OG1  | THR | 11 | 3.880 | 3.790  | 0.054  | 1.00 | 0.00 |
| ATOM | 187 | HG1  | THR | 11 | 3.497 | 2.909  | 0.064  | 1.00 | 0.00 |
| ATOM | 188 | CG2  | THR | 11 | 5.635 | 2.840  | -1.230 | 1.00 | 0.00 |
| ATOM | 189 | HG21 | THR | 11 | 5.627 | 3.450  | -2.121 | 1.00 | 0.00 |
| ATOM | 190 | HG22 | THR | 11 | 4.906 | 2.050  | -1.329 | 1.00 | 0.00 |
| ATOM | 191 | HG23 | THR | 11 | 6.617 | 2.409  | -1.099 | 1.00 | 0.00 |
| ATOM | 192 | C    | THR | 11 | 5.835 | 4.245  | 2.377  | 1.00 | 0.00 |
| ATOM | 193 | O    | THR | 11 | 5.579 | 5.418  | 2.093  | 1.00 | 0.00 |
| ATOM | 194 | N    | GLY | 12 | 6.090 | 3.831  | 3.624  | 1.00 | 0.00 |
| ATOM | 195 | HN   | GLY | 12 | 6.297 | 2.885  | 3.780  | 1.00 | 0.00 |
| ATOM | 196 | CA   | GLY | 12 | 6.079 | 4.756  | 4.751  | 1.00 | 0.00 |
| ATOM | 197 | HA1  | GLY | 12 | 6.987 | 5.341  | 4.727  | 1.00 | 0.00 |
| ATOM | 198 | HA2  | GLY | 12 | 6.060 | 4.185  | 5.667  | 1.00 | 0.00 |
| ATOM | 199 | C    | GLY | 12 | 4.887 | 5.700  | 4.742  | 1.00 | 0.00 |
| ATOM | 200 | OT1  | GLY | 12 | 3.738 | 5.211  | 4.756  | 1.00 | 0.00 |
| ATOM | 201 | OT2  | GLY | 12 | 5.106 | 6.929  | 4.720  | 1.00 | 0.00 |

ENDMDL

## 6. RMSD and RMSF Plots from Simulations of Peptides in the Ground State

Panel *A* of Figure S6 shows the root-mean-square deviations (RMSDs) of the C $\alpha$  carbons from their initial positions during ground-state simulations of the hairpin peptide Ac-WVTIpGKAIFTG-NH<sub>2</sub>. Panels *B* and *C* show the same for the analogs with His replacing Ala8 (*B*) or Phe10 (*C*). *D* and *E* show the RMSDs for peptides with Tyr replacing Ala8 or Phe10; *F* and *G*, for peptides with Glu, Gln, Asp or Asn at position 8. The peptides containing His or Tyr were simulated with the side chains of these residues in both their neutral (H or Y, *black curves*) and ionized (H<sup>+</sup> or Y<sup>-</sup>, *blue and red*, respectively) forms. The MD trajectories were propagated in 1-fs steps at 300 K, and the RMSD was calculated at 1-ps intervals.

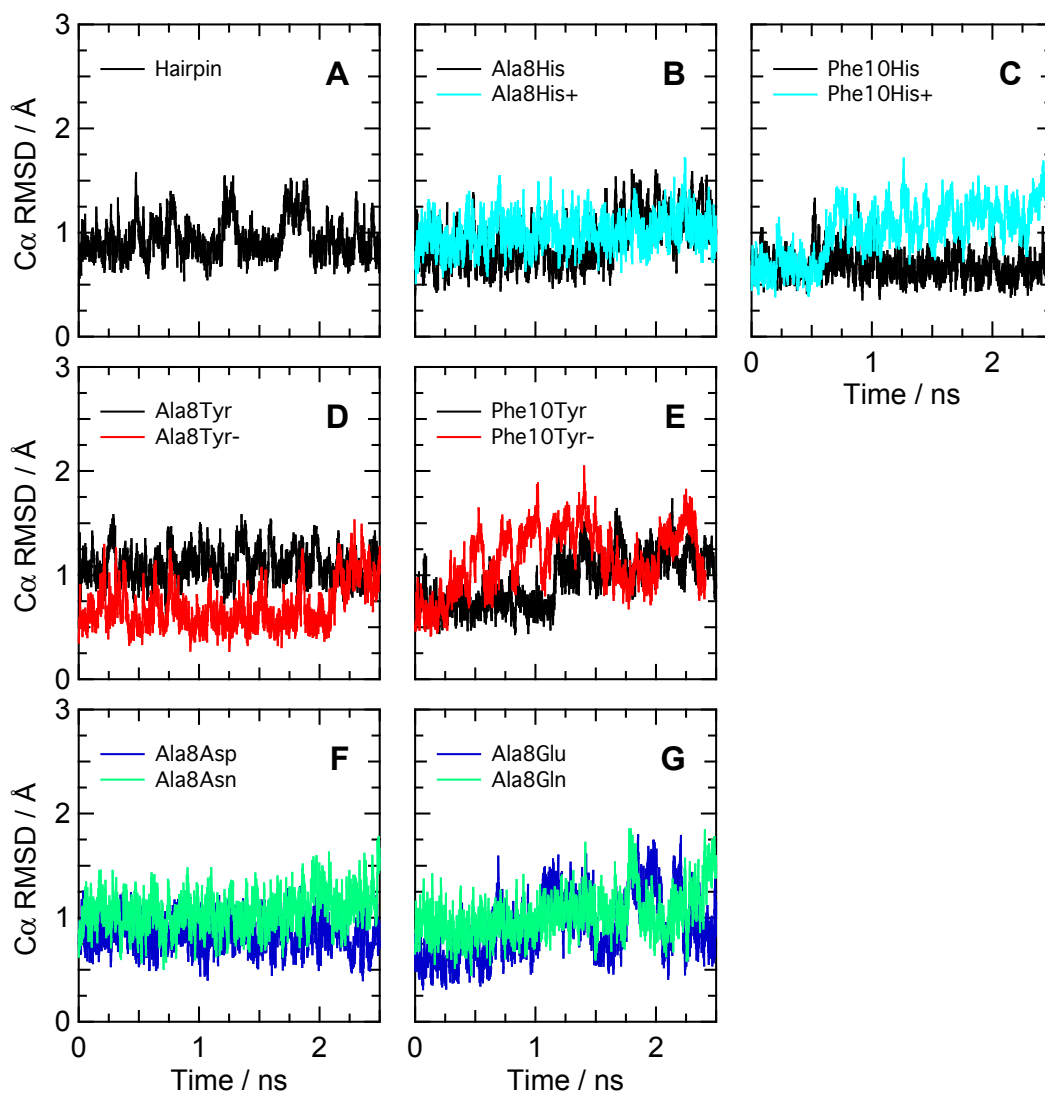

**Figure S6.**

Panels A-C of Figure S7 show the C $\alpha$  RMSDs from ground-state trajectories of the TrpCage16b peptide DAFAQWLADaGPASaRPPPS (A, *black curve*), and its variants with Ala replacing Asp9 (A, *cyan*), citrulline (Cit) replacing Arg16 (B, *black*), Leu replacing Asp9 (B, *cyan*), Ala replacing Asp9 and norvaline (Nva) replacing Arg16 (C, *black*), or Leu replacing Asp9 and Ile replacing Arg16 (C, *cyan*). Panels D-F show the C $\alpha$  RMSDs from trajectories of TrpCage10b peptide, DAFAQWLKDGGPASGRPPPS, with norvaline (Nva) replacing Arg16 (A, *black curve*), Glu replacing Asp9 (A, *cyan*),  $\Delta$ Ser20 (B, *black*), ornithine (Orn) replacing Arg16 (B, *cyan*), Arg replacing Asp9 and Glu replacing Arg16 (C, *black*), or Ala replacing Lys8 (C, *cyan*).

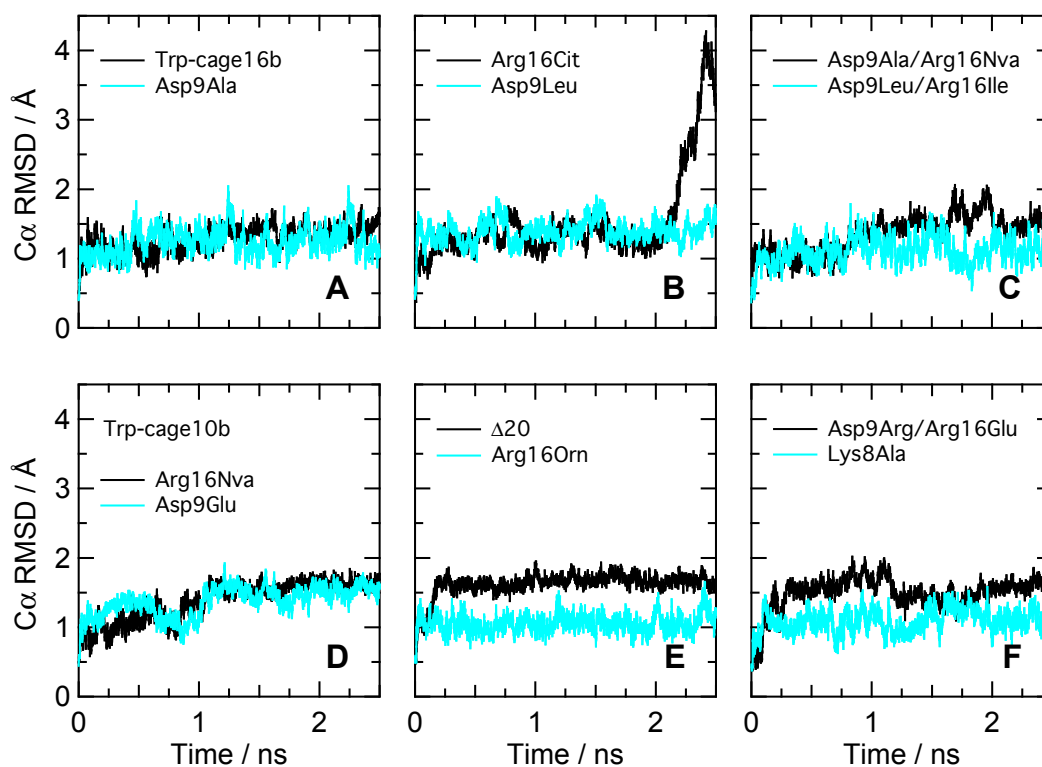

**Figure S7.**



Figure S8 shows representative plots of the root-mean-square fluctuations (RMSFs) of the C $\alpha$  carbons about their mean positions in the same simulations as Figures S6 and S7.

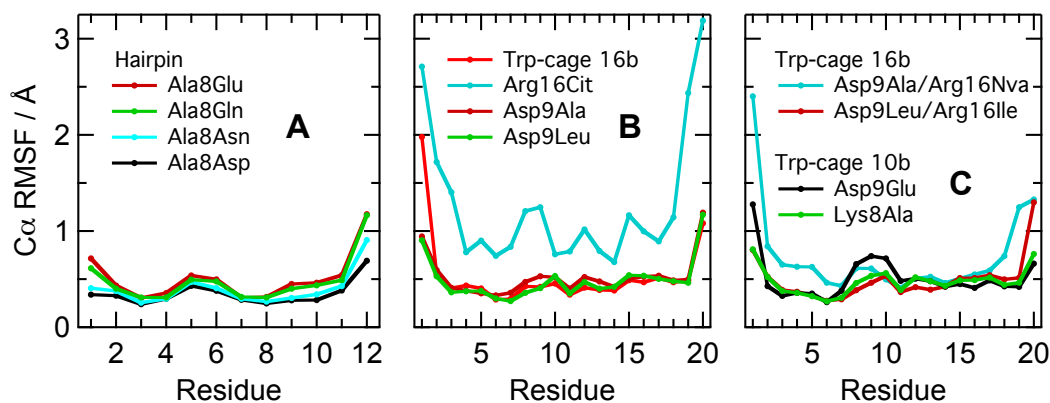

Figure S8.

## 7. Calculated $\pi$ - $\pi^*$ and CT Energies of Additional Peptides

Figure S9 shows the calculated energies of the first two excited singlet  $\pi$ - $\pi^*$  states and lowest four CT states of the hairpin peptide with Trp at position 1 and either serine (*A*), cyclohexylalanine (*B*) or  $\epsilon$ -N-acetyllysine (*C*) replacing Ala at position 8. The results are similar to those obtained with the Ala8 peptide.

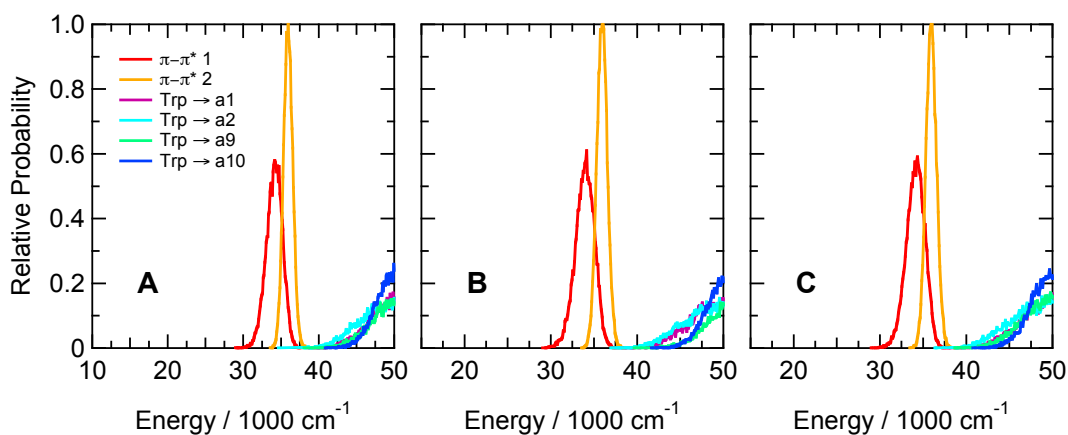

Figure S9.

Figure S10 shows the energy distributions for excited singlet  $\pi$ - $\pi^*$  states and CT states of the Arg16Nva variant of the Trp-cage10b peptide (A), and the Asp8Ala and Asp9Leu/Arg16Ile variants of TrpCage16b peptide (B and C, respectively). The results are similar to those obtained with the other Trp-cage peptides (Figure 8).

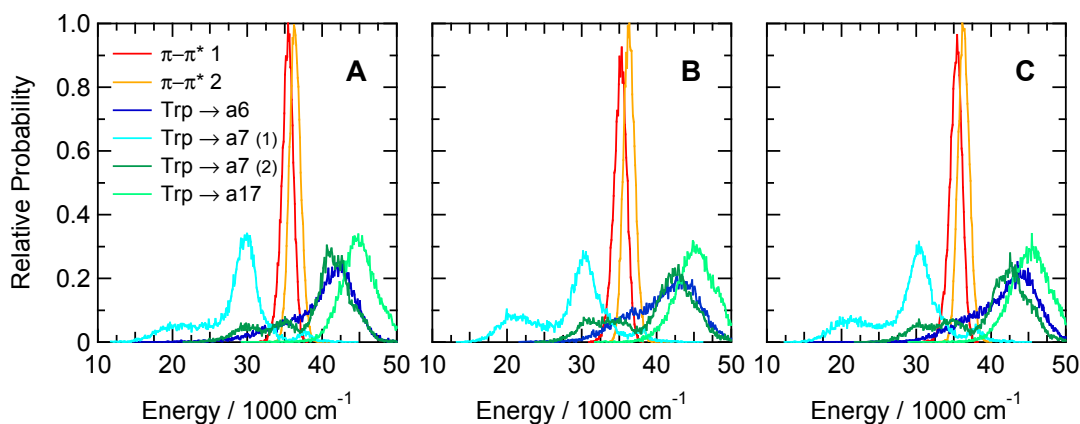

**Figure S10.**

## 8. Predicted Fluorescence Yields

Figure S11 shows the correlation of the measured fluorescence yields with the yields predicted by using eq. (24) with  $\phi_0 = 0.2475$ . The results are for the same 26 peptides used in Figure 10 of the text, and the symbols are the same as in that figure (*circles*, hairpin peptides; *squares*, Trp-cage 16b peptides; and *triangles*, Trp-cage 10b peptides). Other details are given in the legend to Figure 10. The *straight line* is a linear least-squares fit to the data ( $R^2 = 0.836$ , Pearson correlation coefficient = 0.914,  $y$ -intercept =  $0.0050 \pm 0.0132$ , slope =  $0.9411 \pm 0.0851$ ). Note that eq. (24) does not consider the magnitude of the electron-transfer matrix element. Equations (25) – (27) give better overall agreement with experiment, particularly for the peptides with low fluorescence yields (see Figure 10). Plots of  $|V|^2 \xi / (|V|^2 + \hbar \xi / 2\pi)$  and  $\rho_{FC}$ , the two fluctuating functions that enter into eq. (25) are shown in Fig. S12. Table S4 gives the detailed results of both treatments, along with the measured fluorescence yields and their errors.

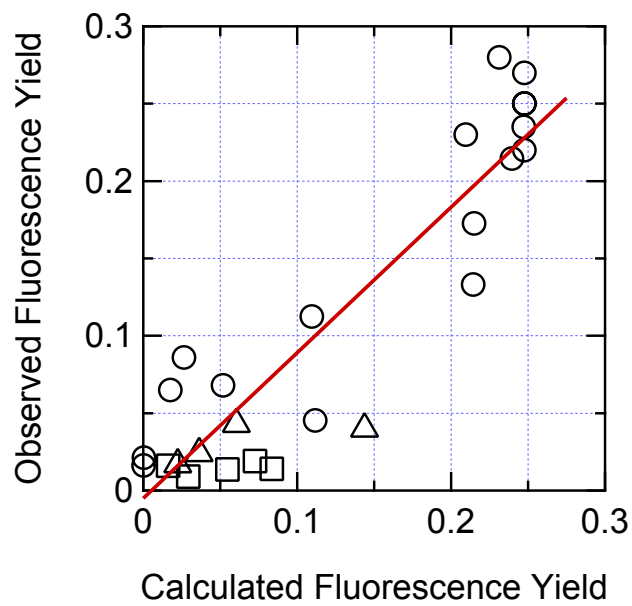

Figure S11.

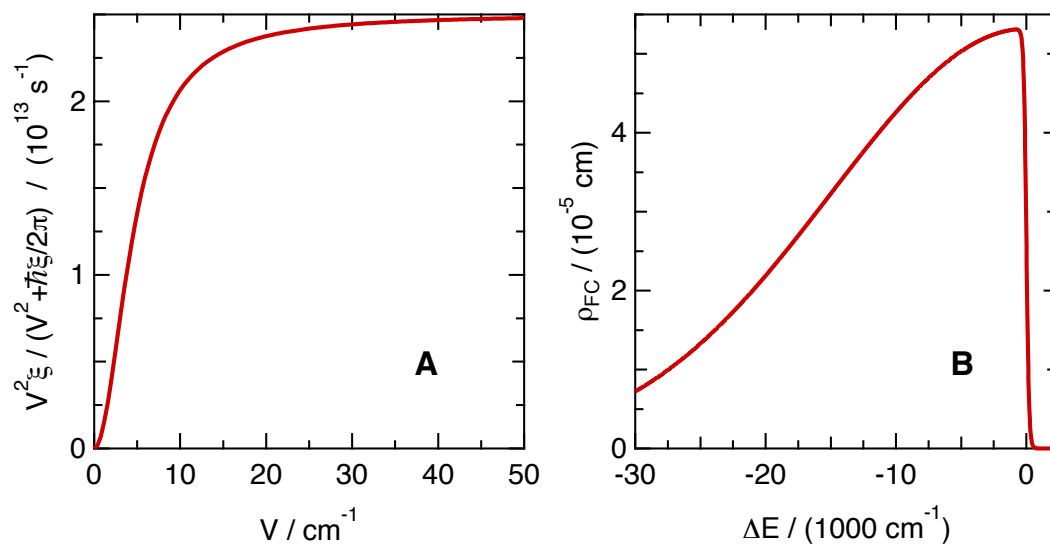

Figure S12.

Table S4

| Peptide                   | $\Phi_f$ obs <sup>a</sup> | $\Phi_f$ calc <sup>b</sup> | $\Phi_f$ calc <sup>c</sup> |
|---------------------------|---------------------------|----------------------------|----------------------------|
| Hairpin <sup>d</sup>      | $0.25 \pm 0.02$           | 0.2475                     | 0.2475                     |
| Ala8Nak                   | $0.25 \pm 0.01$           | 0.2475                     | 0.2475                     |
| Ala8Cha                   | $0.27 \pm 0.01$           | 0.2475                     | 0.2475                     |
| Ala8Ser                   | $0.22 \pm 0.01$           | 0.2475                     | 0.2475                     |
| Ala8Asn                   | $0.28 \pm 0.03$           | 0.2313                     | 0.1817                     |
| Ala8Gln                   | $0.23 \pm 0.02$           | 0.2096                     | 0.1427                     |
| Ala8Asp                   | $0.0649 \pm 0.0065$       | 0.0176                     | 0.0240                     |
| Ala8Glu                   | $0.1124 \pm 0.0113$       | 0.1095                     | 0.0436                     |
| Ala8His                   | $0.2351 \pm 0.0122$       | 0.2471                     | 0.2461                     |
| Ala8His+                  | $0.0860 \pm 0.0063$       | 0.0265                     | 0.0332                     |
| Ala8Tyr                   | $0.1332 \pm 0.0027$       | 0.2144                     | 0.1530                     |
| Ala8Tyr-                  | $0.0162 \pm 0.0061$       | 0.0003                     | 0.0354                     |
| Phe10His                  | $0.2145 \pm 0.0091$       | 0.2394                     | 0.2241                     |
| Phe10His+                 | $0.0454 \pm 0.0054$       | 0.1116                     | 0.0662                     |
| Phe10Tyr                  | $0.1726 \pm 0.0042$       | 0.2149                     | 0.1514                     |
| Phe10Tyr-                 | $0.0212 \pm 0.0082$       | 0.0003                     | 0.0536                     |
| Trp1Phe/Phe10Trp          | $0.068 \pm 0.005$         | 0.0519                     | 0.0298                     |
| Trp-cage 16b <sup>e</sup> | $0.009 \pm 0.001$         | 0.0293                     | 0.0384                     |
| Asp9Leu                   | $0.019 \pm 0.002$         | 0.0726                     | 0.0475                     |
| Asp9Ala/Arg16Nva          | $0.014 \pm 0.001$         | 0.0835                     | 0.0497                     |
| Arg16Cit                  | $0.016 \pm 0.003$         | 0.0162                     | 0.0363                     |
| Asp9Leu/Arg16Ile          | $0.014 \pm 0.004$         | 0.0547                     | 0.0438                     |
| Trp-cage 10b <sup>f</sup> |                           |                            |                            |
| Asp9Arg / Arg16Glu        | $0.040 \pm 0.002$         | 0.1438                     | 0.0727                     |
| Asp9Glu                   | $0.043 \pm 0.005$         | 0.0604                     | 0.0457                     |
| $\Delta$ Ser20            | $0.024 \pm 0.001$         | 0.0363                     | 0.0393                     |
| Lys8Ala                   | $0.017 \pm 0.003$         | 0.0223                     | 0.0375                     |

<sup>a</sup> Observed fluorescence yield. The values for hairpin peptides with Asp, Glu, His or Tyr at position 8 or 10 are the asymptotes of the titration curves shown in Figure 2 of the main text.

<sup>b</sup> Fluorescence yield calculated using eq. (24) with  $\phi_0 = 0.2475$ .

<sup>c</sup> Fluorescence yield calculated using eqs. (25) – (27) with the parameter values given in the text.

<sup>d</sup> Hairpin peptide Ac-WVTIpGKAIFTG-NH<sub>2</sub> with substitutions as indicated (Nak = *N*-acetyllysine, Cha = cyclohexylalanine). Ionized forms of His and Tyr are denoted by + and -.

<sup>e</sup> Trp-cage peptide 16b (DAFAQWLADaGPASaRPPPS) with substitutions as indicated (Nva = norvaline).

<sup>f</sup> Trp-cage peptide 10b (DAFAQWLKDGGPASGRPPPS) with substitutions or deletions as indicated.

---

## 11. References for Supplementary Material

- (1) Gubskaya, A. V.; Kusalik, P. G. *J. Chem. Phys.* **2002**, *117*, 5290-5302.
- (2) Silvestrelli, P. L.; Parrinello, M. *J. Chem. Phys.* **1999**, *111*, 3572-3580.
- (3) Bernardo, D. N.; Ding, Y.; Krogh-Jespersen, K.; Levy, R. M. *J. Phys. Chem.* **1994**, *98*, 4180-4187.
- (4) Burnham, C. J.; Xantheas, S. S. *J. Chem. Phys.* **2002**, *116*,
- (5) Ren, P.; Ponder, J. W. *J. Phys. Chem. B* **2003**, *107*, 5933-5947.
- (6) Jensen, L.; Swart, M.; Van Duijnen, P. T. *J. Chem. Phys.* **2005**, *122*, 034103.
- (7) Soper, A. K.; Benmore, C. J. *Phys. Rev. Lett.* **2008**, Art. 065502.

(8) Sorensen, J. M.; Hura, G.; Glaeser, R. M.; Head-Gordon, T. *J. Chem. Phys.* **2000**, *113*, 9149-9161.

(9) Soper, A. K. *J. Phys. Condensed Matter* **2007**, Art. 335206.

(10) Ichikawa, K.; Kameda, Y.; Yamaguchi, T.; Wakita, H.; Misawa, M. *Mol. Phys.* **1991**, *73*, 79-86.

(11) Mills, R. *J. Phys. Chem.* **1973**, *77*, 685-688.

(12) Holz, M.; Heil, S. R.; Sacco, A. *Phys. Chem. Chem. Phys.* **2000**, *2*, 4740-4742.
